# Supplementary material for: Effects of team-based goals and non-monetary incentives on front-line health worker performance and maternal health behaviours: a cluster randomised controlled trial in Bihar, India
Source: PubMed Central journal article supplement (PMC6730593; doi:10.1136/bmjgh-2018-001146), 2019-08-26
Supplement: bmjgh-2018-001146supp001.pdf [file bmjgh-2018-001146supp001.pdf]

Statistical Methods for: **Effects of team-based goals and non-monetary incentives on frontline health worker performance and maternal health behaviours: a cluster randomized controlled trial in Bihar, India**

Table 2.

Demographics characteristics of FLW (ANMs, ASHAs and AWWs) as well as maternal respondents were compared for all MPR TBGI surveys by the baseline and post-intervention group (Table 1). Percentages were reported as crude percentages without adjusting for any survey design or weights. P value was calculated using two-sample t-test for the continuous variables and chi-square test for the categorical variables. If normality assumption was invalidated, Mann-Whitney U-Test would be performed for continuous variables instead. Fisher-exact test would be conducted for categorical variables with small numbers (<5) in any sub-group.

Table 3.

For all the outcomes in regarding to team-based goals in this table, we set up our survey design using village as primary sampling unit, sub-center as stratum with sampling weights at the household level. Our analytical cohort in this table was responses from the survey data for the AWW and ASHA at post-implementation. For the binary outcomes, rates of occurrence were reported by FLW group (AWW vs ASHA) and treatment groups (treatment vs control) using svytable command accounting for the survey design. To compare the difference of the responses between treatment and control group in both AWW and ASHA, survey logistic regressions were performed to get the p value for the difference in odds comparing the treatment vs the control without adjusting for any participant-level covariates. For discrete counts such as 'Times met with ANM outside subcenter meetings in past three months', survey Poisson regressions were conducted in a similar fashion via the same survey design set-up as survey logistic regressions. Since we had subcenter/stratum with one PSU in our data, we applied the 'options(survey.lonely.psu="adjust")' available in the 'survey' package in order to obtain stable estimates in all our regressions. All analysis was performed in R 3.4.3 via 'survey' package<sup>1,2</sup> available in R CRAN<sup>3</sup>.

Table 5, 6

For all the binary outcomes in regarding to home visits from frontline workers (Table 5) and team-based goals (Table 6) as reported by maternal respondents in this table, we set up our survey design using village as primary sampling unit (psu), sub-center as stratum with sampling weights at the household level. Our analytical cohort in this table was maternal responses from the survey data in both baseline and post-implementation. Rates of occurrence of all our binary outcomes were reported by study period (baseline vs post-implementation) and treatment groups (treatment vs control) using svytable command accounting for the survey design. To compare the difference of the responses between treatment and control group in both baseline and post-implementation, survey logistic regressions were performed to

get the p value for the difference in odds of the outcome comparing the treatment vs the control adjusting for selected maternal respondents' demographic variables that were statistically significant. For each of our binary outcome, we also fit a separate survey logistic regression with all our baseline and post-implementation data to get the p value of the difference in difference estimator (DID, interaction between study period and treatment group), adjusting for selected maternal respondents' demographic variables that were statistically significant in Table 1. Specifically, the independent variables in the logistic regression for DID included treatment group, study period and the interaction of the two and selected demographic variables of the maternal respondents, while the dependent variable was our binary outcome of interest. To calculate percent difference between post-implementation and baseline in terms of difference of rates in the treatment vs control (also interpreted as the 'treatment effect'), we predicted the probability of outcome via our logistic regression with the interaction term and computed the difference in difference in probabilities of the outcome between the treatment and control group between post-implementation and baseline. Since we had subcenter/stratum with one PSU in our data, we applied the 'options(survey.lonely.psu="adjust")' available in the 'survey' package in order to obtain stable estimates in all our regressions. # of participants in each regression model was also reported in the tables. All analysis was performed in R 3.4.3 via 'survey' package<sup>1,2</sup> available in R CRAN<sup>3</sup>.

## Reference:

1. T. Lumley (2017) "survey: analysis of complex survey samples". R package version 3.32.
2. T. Lumley (2004) Analysis of complex survey samples. Journal of Statistical Software 9(1): 1-19
3. <https://cran.rproject.org/web/packages/survey/index.html>

## Appendix. List of Variables for reproducibility

## 1. ANM

| Original Variable | Any Modification (R Codes)                                                                                                                                                     | Description                                                                 |
|-------------------|--------------------------------------------------------------------------------------------------------------------------------------------------------------------------------|-----------------------------------------------------------------------------|
| t0_a1, t2_a1      | data_anm_anly\$live_svillage<-ifelse(<br>data_anm_anly\$endline==1,<br>as.character(data_anm_anly\$t2_a1),<br>as.character(data_anm_anly\$t0_a1))                              | Live in the village that provided service (y/n)                             |
| t2_a7, t0_a7      | data_anm_anly\$hindu<-ifelse(<br>data_anm_anly\$endline==1,<br>as.character(data_anm_anly\$t2_a7),<br>as.character(data_anm_anly\$t0_a7))                                      | Hindu (y/n)                                                                 |
| t2_a9, t0_a9      | data_anm_anly\$caste_hindu<-ifelse(<br>data_anm_anly\$endline==1 &<br>data_anm_anly\$hindu=="yes",<br>as.character(data_anm_anly\$t2_a9),<br>ifelse(data_anm_anly\$endline==0& | Caste (for Hindu Only)<br>- "Scheduled caste/tribe (SC/ST) (lowest caste)", |

|                |                                                                                                                                                                                                                                                                                                                                                                                                                                                                                                                                                                                             |                                                                                                                                                  |
|----------------|---------------------------------------------------------------------------------------------------------------------------------------------------------------------------------------------------------------------------------------------------------------------------------------------------------------------------------------------------------------------------------------------------------------------------------------------------------------------------------------------------------------------------------------------------------------------------------------------|--------------------------------------------------------------------------------------------------------------------------------------------------|
|                | <pre> data_anm_anly\$hindu=="yes", as.character(data_anm_anly\$t0_a9,NA)) data_anm_anly\$caste_hindu&lt;-ifelse( data_anm_anly\$caste_hindu %in% c("scheduled caste", "scheduled tribe"),0, ifelse(data_anm_anly\$caste_hindu %in% c("other backward caste"),1, ifelse(data_anm_anly\$caste_hindu %in% c("general caste", "general caste"),2,NA))) data_anm_anly\$caste_hindu&lt;- factor(data_anm_anly\$caste_hindu, levels=c(0,1,2), labels=c("Scheduled caste/tribe (SC/ST) (lowest caste)", "Other backward caste (socially and educationally disadvantaged)", "General Caste")) </pre> | <ul style="list-style-type: none"> <li>- "Other backward caste (socially and educationally disadvantaged)"</li> <li>- "General Caste"</li> </ul> |
| t2_a11, t0_a11 | <pre> data_anm_anly\$college&lt;- ifelse(data_anm_anly\$endline==1, as.character(data_anm_anly\$t2_a11), ifelse(data_anm_anly\$endline==0, as.character(data_anm_anly\$t0_a11),NA)) </pre>                                                                                                                                                                                                                                                                                                                                                                                                  | College (y/n)                                                                                                                                    |
| treatment      | <pre> data_anm_anly\$trt&lt;- ifelse(data_anm_anly\$treatment=="control sub-centre",0,1) </pre>                                                                                                                                                                                                                                                                                                                                                                                                                                                                                             | Treatment group (y/n)                                                                                                                            |
| t2_a6, t0_a6   | <pre> data_anm_anly\$age&lt;- ifelse(data_anm_anly\$endline==1, data_anm_anly\$t2_a6,data_anm_anly\$t0_a6) </pre>                                                                                                                                                                                                                                                                                                                                                                                                                                                                           | Age (continuous)                                                                                                                                 |
| t2_a3, t0_a3   | <pre> data_anm_anly\$distance_sub&lt;- ifelse(data_anm_anly\$endline==1, data_anm_anly\$t2_a3,data_anm_anly\$t0_a3) </pre>                                                                                                                                                                                                                                                                                                                                                                                                                                                                  | Distance from subcenter village (continuous)                                                                                                     |

## 2. ASHA/AWW

| Original Variable | Any Modification (R Codes)                                                                                                                                                    | Description                                     |
|-------------------|-------------------------------------------------------------------------------------------------------------------------------------------------------------------------------|-------------------------------------------------|
| asha              |                                                                                                                                                                               | Asha (y/n)<br>-0: AWW<br>-1: ASHA               |
| t0_a1, t2_a1      | <pre> data_asha_aww_anly\$live_svillage&lt;- ifelse( data_asha_aww_anly\$endline==1, as.character(data_asha_aww_anly\$t2_a1), as.character(data_asha_aww_anly\$t0_a1)) </pre> | Live in the village that provided service (y/n) |
| t2_a7, t0_a7      | <pre> data_asha_aww_anly\$hindu&lt;-ifelse( data_asha_aww_anly\$endline==1, </pre>                                                                                            | Hindu (y/n)                                     |

|                      |                                                                                                                                                                                                                                                                                                                                                                                                                                                                                                                                                                                                                                                                                                                                                                                                                                                                                                    |                                                                                                                                                                                        |
|----------------------|----------------------------------------------------------------------------------------------------------------------------------------------------------------------------------------------------------------------------------------------------------------------------------------------------------------------------------------------------------------------------------------------------------------------------------------------------------------------------------------------------------------------------------------------------------------------------------------------------------------------------------------------------------------------------------------------------------------------------------------------------------------------------------------------------------------------------------------------------------------------------------------------------|----------------------------------------------------------------------------------------------------------------------------------------------------------------------------------------|
|                      | as.character(data_asha_aww_anly\$t2_a7),<br>as.character(data_asha_aww_anly\$t0_a7))                                                                                                                                                                                                                                                                                                                                                                                                                                                                                                                                                                                                                                                                                                                                                                                                               |                                                                                                                                                                                        |
| t2_a9, t0_a9         | data_asha_aww_anly\$caste_hindu<-ifelse(<br>data_asha_aww_anly\$endline==1 &<br>data_asha_aww_anly\$hindu=="yes",<br>as.character(data_asha_aww_anly\$t2_a9),<br>ifelse(data_asha_aww_anly\$endline==0&<br>data_asha_aww_anly\$hindu=="yes",<br>as.character(data_asha_aww_anly\$t0_a9),<br>NA))<br>data_asha_aww_anly\$caste_hindu<-ifelse(<br>data_asha_aww_anly\$caste_hindu %in%<br>c("scheduled caste",<br>"scheduled tribe"),0,<br>ifelse(data_asha_aww_anly\$caste_hindu %<br>in%<br>c("other backward caste"),1,<br>ifelse(data_asha_aww_anly\$caste_hindu %<br>in%<br>c("general caste", "general<br>caste"),2,NA)))<br>data_asha_aww_anly\$caste_hindu<-<br>factor(data_asha_aww_anly\$caste_hin<br>du,<br>levels=c(0,1,2),<br>labels=c("Scheduled caste/tribe (SC/ST)<br>(lowest caste)",<br>"Other backward caste (socially and<br>educationally disadvantaged)",<br>"General Caste")) | Caste (for Hindu Only)<br>- "Scheduled<br>caste/tribe (SC/ST)<br>(lowest caste)",<br>- "Other backward<br>caste (socially and<br>educationally<br>disadvantaged)"<br>- "General Caste" |
| treatment            | data_asha_aww_anly\$trt<-<br>ifelse(data_asha_aww_anly\$treatment<br>=="control sub-centre",0,1)                                                                                                                                                                                                                                                                                                                                                                                                                                                                                                                                                                                                                                                                                                                                                                                                   | Treatment group (y/n)                                                                                                                                                                  |
| t2_a6, t0_a6         | data_asha_aww_anly\$age<-<br>ifelse(data_asha_aww_anly\$endline==1<br>,<br>data_asha_aww_anly\$t2_a6,data_asha<br>_aww_anly\$t0_a6)                                                                                                                                                                                                                                                                                                                                                                                                                                                                                                                                                                                                                                                                                                                                                                | Age (continuous)                                                                                                                                                                       |
| t2_flw2_attscm_3more |                                                                                                                                                                                                                                                                                                                                                                                                                                                                                                                                                                                                                                                                                                                                                                                                                                                                                                    | Attended three or more<br>subcenter meetings in the<br>past three months (y/n)                                                                                                         |
| t2_flw2_team_othflw  |                                                                                                                                                                                                                                                                                                                                                                                                                                                                                                                                                                                                                                                                                                                                                                                                                                                                                                    | Consider Other FLW of the<br>village (other cadre) part of<br>the team (y/n)                                                                                                           |
| t2_flw2_team_anm     |                                                                                                                                                                                                                                                                                                                                                                                                                                                                                                                                                                                                                                                                                                                                                                                                                                                                                                    | Consider Subcenter<br>Auxiliary Nurse Midwife<br>(ANM) part of the team<br>(y/n)                                                                                                       |

|                               |                                                                                                                                                         |                                                                                                            |
|-------------------------------|---------------------------------------------------------------------------------------------------------------------------------------------------------|------------------------------------------------------------------------------------------------------------|
| t2_flw2_team_sameflw_sc       |                                                                                                                                                         | Consider Same-cadre frontline workers (FLWs) at subcenter part of the team (y/n)                           |
| t2_flw2_team_othflw_sc        |                                                                                                                                                         | Consider Other-cadre FLWs at the subcenter part of the team (y/n)                                          |
| t2_flw2_teamhelp_always       |                                                                                                                                                         | Always expected to plan with team (y/n)                                                                    |
| t2_flw2_teamplan_always       |                                                                                                                                                         | Always expected to plan with team                                                                          |
| t2_flw2_teammeet_always       |                                                                                                                                                         | Always expected to meet regularly with team                                                                |
| t2_flw2_anmjointvis           |                                                                                                                                                         | Any joint visits with ANM in past month                                                                    |
| t2_asha_wt,<br>t2_aww_wt      | data_asha_aww_endline\$t2_wt<-<br>ifelse(data_asha_aww_endline\$asha==<br>1,<br>data_asha_aww_endline\$t2_asha_wt,<br>data_asha_aww_endline\$t2_aww_wt) | Endline household weight                                                                                   |
| village                       |                                                                                                                                                         | Village ID                                                                                                 |
| sc_code                       |                                                                                                                                                         | Subcenter ID                                                                                               |
| t2_flw2_meetanm_out<br>sidesc |                                                                                                                                                         | Times met with ANM outside subcenter meetings in past three months (number)                                |
| t2_flw2_numjointvisit         |                                                                                                                                                         | Number of joint home visits in the past week (number)                                                      |
| t2_flw2_meet_othflw           |                                                                                                                                                         | Number of times met with opposite-cadre FLW in past week to discuss work (number)                          |
| t2_flw2_othflw_cover          |                                                                                                                                                         | Number of times asked opposite-cadre FLW to conduct visit (because you could not) in past 30 days (number) |
| t2_flw2_you_cover             |                                                                                                                                                         | Number of times opposite-cadre FLW asked to conduct visit (because she could not) in past 30 days (number) |

### 3. Maternal Respondents (or household survey)

| Original Variable  | Any Modification (R Codes)                                                                              | Description |
|--------------------|---------------------------------------------------------------------------------------------------------|-------------|
| t2_hindu, t0_hindu | data_hh_anly\$hindu<-ifelse(data_hh_anly\$endline==1,<br>data_hh_anly\$t2_hindu,data_hh_anly\$t0_hindu) | Hindu (y/n) |

|                                                                                                                                                                                                                 |                                                                                                                                                                                                                                                                                                                                                                                                                                                                                                                                                                                                                                                                                                                                                                                                                                                                                                                                                                                                                                                                                                                                                                                                                                                                                                        |                                                                                                                                                                         |
|-----------------------------------------------------------------------------------------------------------------------------------------------------------------------------------------------------------------|--------------------------------------------------------------------------------------------------------------------------------------------------------------------------------------------------------------------------------------------------------------------------------------------------------------------------------------------------------------------------------------------------------------------------------------------------------------------------------------------------------------------------------------------------------------------------------------------------------------------------------------------------------------------------------------------------------------------------------------------------------------------------------------------------------------------------------------------------------------------------------------------------------------------------------------------------------------------------------------------------------------------------------------------------------------------------------------------------------------------------------------------------------------------------------------------------------------------------------------------------------------------------------------------------------|-------------------------------------------------------------------------------------------------------------------------------------------------------------------------|
|                                                                                                                                                                                                                 | <pre>data_hh_anly\$hindu&lt;- ifelse(data_hh_anly\$hindu==1,"yes", ifelse(data_hh_anly\$hindu==0,"no",NA))</pre>                                                                                                                                                                                                                                                                                                                                                                                                                                                                                                                                                                                                                                                                                                                                                                                                                                                                                                                                                                                                                                                                                                                                                                                       |                                                                                                                                                                         |
| t2_scst, t0_scst                                                                                                                                                                                                | <pre>data_hh_anly\$caste_hindu&lt;- ifelse(data_hh_anly\$endline==1 &amp; data_hh_anly\$hindu=="yes" &amp; is.na(data_hh_anly\$hindu)==F , data_hh_anly\$t2_scst,ifelse(data_hh_anly\$endline==0&amp; data_hh_anly\$hindu=="yes" &amp; is.na(data_hh_anly\$hindu)==F,data_hh_anly\$t0_scst,NA)) data_hh_anly\$caste_hindu&lt;- factor(data_hh_anly\$caste_hindu,levels=c(0,1),labels=c("No t Scheduled caste/tribe (SC/ST)","Scheduled caste/tribe (SC/ST)"))</pre>                                                                                                                                                                                                                                                                                                                                                                                                                                                                                                                                                                                                                                                                                                                                                                                                                                    | <p>Caste (for Hindu Only)</p> <ul style="list-style-type: none"> <li>- "Not Scheduled caste/tribe (SC/ST)"</li> <li>- "Scheduled caste/tribe (SC/ST)"</li> </ul>        |
| treatment                                                                                                                                                                                                       |                                                                                                                                                                                                                                                                                                                                                                                                                                                                                                                                                                                                                                                                                                                                                                                                                                                                                                                                                                                                                                                                                                                                                                                                                                                                                                        | Treatment group (y/n)                                                                                                                                                   |
| t2_agefml_15to19,<br>t0_agefml_15to19,<br>t2_agefml_20to24,<br>t0_agefml_20to24,<br>t2_agefml_25to29,<br>t0_agefml_25to29,<br>t2_agefml_30to34,<br>t0_agefml_30to34,<br>t2_agefml_35older,<br>t0_agefml_35older | <pre>data_hh_anly\$hh_age_15to19&lt;- ifelse(data_hh_anly\$endline==1, data_hh_anly\$t2_agefml_15to19, data_hh_anly\$t0_agefml_15to19) data_hh_anly\$hh_age_20to24&lt;- ifelse(data_hh_anly\$endline==1, data_hh_anly\$t2_agefml_20to24, data_hh_anly\$t0_agefml_20to24) data_hh_anly\$hh_age_25to29&lt;- ifelse(data_hh_anly\$endline==1, data_hh_anly\$t2_agefml_25to29, data_hh_anly\$t0_agefml_25to29) data_hh_anly\$hh_age_30to34&lt;- ifelse(data_hh_anly\$endline==1, data_hh_anly\$t2_agefml_30to34, data_hh_anly\$t0_agefml_30to34) data_hh_anly\$hh_age_35older&lt;- ifelse(data_hh_anly\$endline==1,data_hh_anly\$t2_agefml_3 5older, data_hh_anly\$t0_agefml_35older) data_hh_anly\$hh_age_cat&lt;- ifelse(data_hh_anly\$hh_age_15to19==1 &amp; is.na(data_hh_anly\$hh_age_15to19)==F,1, ifelse(data_hh_anly\$hh_age_20to24==1 &amp; is.na(data_hh_anly\$hh_age_20to24)==F,2, ifelse(data_hh_anly\$hh_age_25to29==1 &amp; is.na(data_hh_anly\$hh_age_25to29)==F,3, ifelse(data_hh_anly\$hh_age_30to34==1 &amp; is.na(data_hh_anly\$hh_age_30to34)==F,4, ifelse(data_hh_anly\$hh_age_35older==1 &amp; is.na(data_hh_anly\$hh_age_35older)==F,5,NA)))) data_hh_anly\$hh_age_cat&lt;- factor(data_hh_anly\$hh_age_cat,levels=c(1:5),labels=c ("15-19","20-24","25-29","30-34","35-49"))</pre> | <p>Age Categorical-</p> <ul style="list-style-type: none"> <li>- 15 to 19</li> <li>- 20 to 24</li> <li>- 25 to 29</li> <li>- 30 to 34</li> <li>- 35 or older</li> </ul> |

|                                                                                                         |                                                                                                                                                                                                                                                                                                                                                                                                                                                                                                                   |                                                                                              |
|---------------------------------------------------------------------------------------------------------|-------------------------------------------------------------------------------------------------------------------------------------------------------------------------------------------------------------------------------------------------------------------------------------------------------------------------------------------------------------------------------------------------------------------------------------------------------------------------------------------------------------------|----------------------------------------------------------------------------------------------|
| t2_d01,<br>t0_d01                                                                                       | data_hh_anly\$hh_numkids_cat<-<br>ifelse(data_hh_anly\$endline==1,data_hh_anly\$t2_d01,data_hh_anly\$t0_d01)<br>data_hh_anly\$hh_numkids_cat<-<br>ifelse(data_hh_anly\$hh_numkids_cat<4&<br>is.na(data_hh_anly\$hh_numkids_cat)==F,data_hh_anly\$hh_numkids_cat, ifelse(data_hh_anly\$hh_numkids_cat>=4&<br>is.na(data_hh_anly\$hh_numkids_cat)==F,4,NA))<br>data_hh_anly\$hh_numkids_cat<-<br>factor(data_hh_anly\$hh_numkids_cat,levels=1:4,labels=c("1 Child","2 Children","3 Children","4 or More Children")) | Numbers of Kids<br>- "1 Child"<br>- "2 Children"<br>- "3 Children"<br>- "4 or More Children" |
| t2_literate,<br>t0_literate                                                                             | data_hh_anly\$hh_literate<-<br>ifelse(data_hh_anly\$endline==1,data_hh_anly\$t2_literate,data_hh_anly\$t0_literate)                                                                                                                                                                                                                                                                                                                                                                                               | Literacy (y/n)                                                                               |
| t2_bpl,<br>t0_bpl                                                                                       | data_hh_anly\$hh_bpl<-<br>ifelse(data_hh_anly\$endline==1,data_hh_anly\$t2_bpl,data_hh_anly\$t0_bpl)                                                                                                                                                                                                                                                                                                                                                                                                              | BPL (y/n)                                                                                    |
| t2_wealthindex_qurt,<br>t0_wealthindex_qurt                                                             | data_hh_anly\$hh_wealthindex_qurt<-<br>ifelse(data_hh_anly\$endline==1,data_hh_anly\$t2_wealthindex_qurt,data_hh_anly\$t0_wealthindex_qurt)                                                                                                                                                                                                                                                                                                                                                                       | Wealth Quartile<br>- 1<br>- 2<br>- 3<br>- 4                                                  |
| t2_agefml,<br>t0_agefml                                                                                 | data_hh_anly\$hh_age<-<br>ifelse(data_hh_anly\$endline==1,data_hh_anly\$t2_agefml,data_hh_anly\$t0_agefml)                                                                                                                                                                                                                                                                                                                                                                                                        | Age (continuous)                                                                             |
| t2_hhsize,<br>t0_hhsize                                                                                 | data_hh_anly\$hh_size<-<br>ifelse(data_hh_anly\$endline==1,data_hh_anly\$t2_hhsize,data_hh_anly\$t0_hhsize)                                                                                                                                                                                                                                                                                                                                                                                                       | Household Size (continuous)                                                                  |
| t2_flw_visit_tot_3trim_atl2,<br>t0_flw_visit_tot_3trim_atl2                                             | data_hh_anly\$ flw_visit_tot_3trim_atl2<-<br>ifelse(data_hh_anly\$endline==1,<br>data_hh_anly\$ t2_flw_visit_tot_3trim_atl2,<br>data_hh_anly\$ t0_flw_visit_tot_3trim_atl2)                                                                                                                                                                                                                                                                                                                                       | At least antenatal home visits in the final trimester (y/n)                                  |
| t2_flw_visit_firstmonth,<br>t0_flw_visit_firstmonth                                                     | data_hh_anly\$ flw_visit_firstmonth <-<br>ifelse(data_hh_anly\$endline==1,<br>data_hh_anly\$ t2_flw_visit_firstmonth,<br>data_hh_anly\$ t0_flw_visit_firstmonth)                                                                                                                                                                                                                                                                                                                                                  | At least one home visit within 1 month of delivery (y/n)                                     |
| t2_flw_visit_first24_homdel,<br>t0_flw_visit_first24_homdel                                             | data_hh_anly\$ flw_visit_first24_homdel <-<br>ifelse(data_hh_anly\$endline==1,<br>data_hh_anly\$ t2_flw_visit_first24_homdel,<br>data_hh_anly\$ t0_flw_visit_first24_homdel)                                                                                                                                                                                                                                                                                                                                      | At least one home visit within 24 hour of home delivery (y/n)                                |
| t0_focal_child_age_mths,<br>t2_focal_child_age_mths,<br>t2_flw_visit_compfeed,<br>t0_flw_visit_compfeed | data_hh_anly\$t0_compfeed_child6_11<-<br>ifelse(data_hh_anly\$baseline==1 &<br>data_hh_anly\$t0_focal_child_age_mths>=6 &<br>is.na(data_hh_anly\$t0_focal_child_age_mths)==F &<br>data_hh_anly\$t0_focal_child_age_mths<=11,data_hh_anly\$t0_flw_visit_compfeed,NA)<br><br>data_hh_anly\$t2_compfeed_child6_11<-<br>ifelse(data_hh_anly\$baseline==0 &<br>data_hh_anly\$t2_focal_child_age_mths>=6 &                                                                                                              | Home Visit for Complementary Feeding for Women with infants 6-11 months (y/n)                |

|                                                                                                             |                                                                                                                                                                                                                                                                                                                                                                                                                                                                                                                                                                                                                                                                                                                   |                                                                            |
|-------------------------------------------------------------------------------------------------------------|-------------------------------------------------------------------------------------------------------------------------------------------------------------------------------------------------------------------------------------------------------------------------------------------------------------------------------------------------------------------------------------------------------------------------------------------------------------------------------------------------------------------------------------------------------------------------------------------------------------------------------------------------------------------------------------------------------------------|----------------------------------------------------------------------------|
|                                                                                                             | <pre>is.na(data_hh_anly\$t2_focal_child_agemths)==F &amp; data_hh_anly\$t2_focal_child_agemths&lt;=11,data_hh_anly\$t 2_flw_visit_compfeed,NA)  data_hh_anly \$compfeed_child6_11&lt;- ifelse(data_hh_anly\$endline==1, data_hh_anly\$ t2_compfeed_child6_11, dat_hh_anly\$ t0_compfeed_child6_11</pre>                                                                                                                                                                                                                                                                                                                                                                                                           |                                                                            |
| t2_focal_child_age<br>mths,<br>t0_focal_child_age<br>mths,<br>t2_flw_visit_flyplan,<br>t0_flw_visit_flyplan | <pre>data_hh_anly\$t0_flyplan_childless6&lt;- ifelse(data_hh_anly\$baseline==1 &amp; data_hh_anly\$t0_focal_child_agemths&lt;6&amp; is.na(data_hh_anly\$t0_focal_child_agemths)==F ,data_hh_a nly\$t0_flw_visit_flyplan,NA)  data_hh_anly\$t2_flyplan_childless6&lt;- ifelse(data_hh_anly\$baseline==0 &amp; data_hh_anly\$t2_focal_child_agemths&lt;6&amp; is.na(data_hh_anly\$t2_focal_child_agemths)==F ,data_hh_a nly\$t2_flw_visit_flyplan,NA)  data_hh_anly \$ flyplan_childless6 &lt;- ifelse(data_hh_anly\$endline==1, data_hh_anly\$ t2_flyplan_childless6, dat_hh_anly\$ t0_flyplan_childless6</pre>                                                                                                    | Postpartum family planning for women with infants less than 6 months (y/n) |
| t2_focal_child_age<br>mths,<br>t0_focal_child_age<br>mths,<br>t2_flw_visit_flyplan,<br>t0_flw_visit_flyplan | <pre>data_hh_anly\$t0_flyplan_child_6_11&lt;- ifelse(data_hh_anly\$baseline==1 &amp;data_hh_anly\$t0_focal_child_agemths&lt;=11&amp; data_hh_anly\$t0_focal_child_agemths&gt;=6&amp; is.na(data_hh_anly\$t0_focal_child_agemths)==F ,data_hh_a nly\$t0_flw_visit_flyplan,NA)  data_hh_anly\$t2_flyplan_child_6_11&lt;- ifelse(data_hh_anly\$baseline==0 &amp; data_hh_anly\$t2_focal_child_agemths&lt;=11 &amp; data_hh_anly\$t2_focal_child_agemths&gt;=6&amp; is.na(data_hh_anly\$t2_focal_child_agemths)==F ,data_hh_a nly\$t2_flw_visit_flyplan,NA)  data_hh_anly \$ flyplan_child_6_11&lt;- ifelse(data_hh_anly\$endline==1, data_hh_anly\$ t2_flyplan_child_6_11, dat_hh_anly\$ t0_flyplan_child_6_11</pre> | Postpartum family planning for women with infants 6-11 months (y/n)        |
| t0_anc_transp_flwn<br>um,<br>t2_anc_transp_flwn<br>um                                                       | <pre>data_hh_anly \$ anc_transp_flwnum &lt;- ifelse(data_hh_anly\$endline==1, data_hh_anly\$ t2_anc_transp_flwnum, dat_hh_anly\$ t0_anc_transp_flwnum</pre>                                                                                                                                                                                                                                                                                                                                                                                                                                                                                                                                                       | Obtain Number of Frontier workers' phone (y/n)                             |
| t0_anc_transp_pvtv<br>ehnum,<br>t2_anc_transp_pvtv<br>ehnum                                                 | <pre>data_hh_anly \$ anc_transp_pvtvehnum &lt;- ifelse(data_hh_anly\$endline==1, data_hh_anly\$ t2_anc_transp_pvtvehnum, dat_hh_anly\$ t0_anc_transp_pvtvehnum</pre>                                                                                                                                                                                                                                                                                                                                                                                                                                                                                                                                              | Obtain Number of Private Vehicle (y/n)                                     |
| t2_anc_transp_any<br>num,                                                                                   | <pre>data_hh_anly \$ anc_transp_anynum &lt;- ifelse(data_hh_anly\$endline==1,</pre>                                                                                                                                                                                                                                                                                                                                                                                                                                                                                                                                                                                                                               | Obtain Number of the Ambulance (y/n)                                       |



|                                                                                                                                 |                                                                                                                                                                                                                                                                                                                                                                                                                                                                                                                                                                                                                                                                                                                                                                            |                                                                                  |
|---------------------------------------------------------------------------------------------------------------------------------|----------------------------------------------------------------------------------------------------------------------------------------------------------------------------------------------------------------------------------------------------------------------------------------------------------------------------------------------------------------------------------------------------------------------------------------------------------------------------------------------------------------------------------------------------------------------------------------------------------------------------------------------------------------------------------------------------------------------------------------------------------------------------|----------------------------------------------------------------------------------|
| t0_anc_transp_any<br>num                                                                                                        | data_hh_ally\$t2_anc_transp_anynum,<br>dat_hh_ally\$t0_anc_transp_anynum                                                                                                                                                                                                                                                                                                                                                                                                                                                                                                                                                                                                                                                                                                   |                                                                                  |
| t2_anc_transp_any<br>num,<br>t0_anc_transp_any<br>num                                                                           | data_hh_ally\$ anc_transp_anynum <-<br>ifelse(data_hh_ally\$endline==1,<br>data_hh_ally\$t2_anc_transp_anynum,<br>dat_hh_ally\$t0_anc_transp_anynum                                                                                                                                                                                                                                                                                                                                                                                                                                                                                                                                                                                                                        | Obtain Any Number (y/n)                                                          |
| t2_anc_ifa_atl90rec<br>,<br>t0_anc_ifa_atl90rec                                                                                 | data_hh_ally\$ anc_ifa_atl90rec <-<br>ifelse(data_hh_ally\$endline==1,<br>data_hh_ally\$t2_anc_ifa_atl90rec,<br>dat_hh_ally\$t0_anc_ifa_atl90rec                                                                                                                                                                                                                                                                                                                                                                                                                                                                                                                                                                                                                           | Received 90 IFA tablets<br>(y/n)                                                 |
| t2_dppc_imbrfeed<br>d,<br>t0_dppc_imbrfeed<br>d                                                                                 | data_hh_ally\$ dppc_imbrfeed <-<br>ifelse(data_hh_ally\$endline==1,<br>data_hh_ally\$t2_dppc_imbrfeed ,<br>dat_hh_ally\$t0_dppc_imbrfeed                                                                                                                                                                                                                                                                                                                                                                                                                                                                                                                                                                                                                                   | Immediate Breastfeeding<br>(y/n)                                                 |
| t2_f38,<br>t0_f38                                                                                                               | data_hh_ally\$t0_cord_notapplied<-<br>abs(as.numeric(data_hh_ally\$t0_f38)-2)<br><br>data_hh_ally\$t2_cord_notapplied<-<br>abs(as.numeric(data_hh_ally\$t2_f38)-2)<br><br>data_hh_ally\$ cord_notapplied <-<br>ifelse(data_hh_ally\$endline==1,<br>data_hh_ally\$t2_cord_notapplied,<br>dat_hh_ally\$t0_cord_notapplied                                                                                                                                                                                                                                                                                                                                                                                                                                                    | Nothing applied to cord<br>after cutting                                         |
| t2_focal_child_age<br>mths,<br>t0_focal_child_age<br>mths,<br>t2_feed_ancycereal_<br>prevday,<br>t0_feed_ancycereal_<br>prevday | data_hh_ally\$t0_feed_ancycereal_prevday_6_11<-<br>ifelse(data_hh_ally\$baseline==1 &<br>data_hh_ally\$t0_focal_child_agemths>=6 &<br>data_hh_ally\$t0_focal_child_agemths<=11 &<br>is.na(data_hh_ally\$t0_focal_child_agemths)==F,data_hh_a<br>nly\$t0_feed_ancycereal_prevday,NA)<br><br>data_hh_ally\$t2_feed_ancycereal_prevday_6_11<-<br>ifelse(data_hh_ally\$baseline==0 &<br>data_hh_ally\$t2_focal_child_agemths>=6 &<br>data_hh_ally\$t2_focal_child_agemths<=11 &<br>is.na(data_hh_ally\$t2_focal_child_agemths)==F,data_hh_a<br>nly\$t2_feed_ancycereal_prevday,NA)<br><br>data_hh_ally\$ feed_ancycereal_prevday_6_11<-<br>ifelse(data_hh_ally\$endline==1,<br>data_hh_ally\$t2_feed_ancycereal_prevday_6_11 ,<br>dat_hh_ally\$t0_feed_ancycereal_prevday_6_11 | Infant age 6-11 months old<br>ate cereal-based meal in<br>previous day (y/n)     |
| t2_focal_child_age<br>mths,<br>t0_focal_child_age<br>mths,<br>t2_fp_contr_anymo<br>dern,<br>t0_fp_contr_anymo<br>dern           | data_hh_ally\$t0_fp_contr_anymodern_less6<-<br>ifelse(data_hh_ally\$baseline==1 &<br>data_hh_ally\$t0_focal_child_agemths<6 &<br>is.na(data_hh_ally\$t0_focal_child_agemths)==F,data_hh_a<br>nly\$t0_fp_contr_anymodern,NA)<br><br>data_hh_ally\$t2_fp_contr_anymodern_less6<-<br>ifelse(data_hh_ally\$baseline==0 &<br>data_hh_ally\$t2_focal_child_agemths<6 &                                                                                                                                                                                                                                                                                                                                                                                                           | Current use of any modern<br>method of contraception<br>(infants<6 months) (y/n) |

|                                                                                                                   |                                                                                                                                                                                                                                                                                                                                                                                                                                                                                                                                                                                                                                                                                                                                                                                                                                                                                                                                                             |                                                                         |
|-------------------------------------------------------------------------------------------------------------------|-------------------------------------------------------------------------------------------------------------------------------------------------------------------------------------------------------------------------------------------------------------------------------------------------------------------------------------------------------------------------------------------------------------------------------------------------------------------------------------------------------------------------------------------------------------------------------------------------------------------------------------------------------------------------------------------------------------------------------------------------------------------------------------------------------------------------------------------------------------------------------------------------------------------------------------------------------------|-------------------------------------------------------------------------|
|                                                                                                                   | <pre>is.na(data_hh_anly\$t2_focal_child_age_mths)==F,data_hh_anly\$t2_fp_contr_anymodern,NA)  data_hh_anly \$ fp_contr_anymodern_less6&lt;- ifelse(data_hh_anly\$endline==1, data_hh_anly\$t2_fp_contr_anymodern_less6, dat_hh_anly\$t0_fp_contr_anymodern_less6</pre>                                                                                                                                                                                                                                                                                                                                                                                                                                                                                                                                                                                                                                                                                      |                                                                         |
| <p>t2_focal_child_age_mths,<br/>t0_focal_child_age_mths,<br/>t2_fp_contr_anymodern,<br/>t0_fp_contr_anymodern</p> | <pre>data_hh_anly\$t0_fp_contr_anymodern_6_11&lt;- ifelse(data_hh_anly\$baseline==1 &amp; data_hh_anly\$t0_focal_child_age_mths&gt;=6 &amp; data_hh_anly\$t0_focal_child_age_mths&lt;=11 &amp; is.na(data_hh_anly\$t0_focal_child_age_mths)==F,data_hh_anly\$t0_fp_contr_anymodern,NA)  data_hh_anly\$t2_fp_contr_anymodern_6_11&lt;- ifelse(data_hh_anly\$baseline==0 &amp; data_hh_anly\$t2_focal_child_age_mths&gt;=6 &amp; data_hh_anly\$t2_focal_child_age_mths&lt;=11 &amp; is.na(data_hh_anly\$t2_focal_child_age_mths)==F,data_hh_anly\$t2_fp_contr_anymodern,NA)  data_hh_anly \$ fp_contr_anymodern_6_11&lt;- ifelse(data_hh_anly\$endline==1, data_hh_anly\$t2_fp_contr_anymodern_6_11, dat_hh_anly\$t0_fp_contr_anymodern_6_11</pre>                                                                                                                                                                                                            | Current use of any modern method of contraception (infants 6-11 months) |
| <p>t2_imm_dpt3_gt6,<br/>t0_imm_dpt3_gt6m</p>                                                                      | <pre>data_hh_anly \$ imm_dpt3_gt6&lt;- ifelse(data_hh_anly\$endline==1, data_hh_anly\$t2_imm_dpt3_gt6, dat_hh_anly\$t0_imm_dpt3_gt6</pre>                                                                                                                                                                                                                                                                                                                                                                                                                                                                                                                                                                                                                                                                                                                                                                                                                   | Child age 6-11 months old received DPT3 vaccination                     |
| <p>t0_n22,<br/>t2_flw_visit_first24,<br/>t2_flw_visit_firstweek</p>                                               | <pre>data_hh_anly\$t0_flw_firstweek_24hrinclude&lt;- ifelse(data_hh_anly\$t0_n22=="yes" &amp; is.na(data_hh_anly\$t0_n22)==F,1,ifelse(data_hh_anly\$baseline==1 &amp; (is.na(data_hh_anly\$t0_n22) data_hh_anly\$t0_n22=="no" &amp; is.na(data_hh_anly\$t0_n22)==F),0,NA))  data_hh_anly\$t2_flw_firstweek_24hrinclude&lt;- ifelse((data_hh_anly\$t2_flw_visit_first24==1 &amp; is.na(data_hh_anly\$t2_flw_visit_first24)==F) (data_hh_anly\$t2_flw_visit_firstweek==1 &amp; is.na(data_hh_anly\$t2_flw_visit_firstweek)==F),1,ifelse(data_hh_anly\$endline==1 &amp; ((data_hh_anly\$t2_flw_visit_first24==0 &amp; is.na(data_hh_anly\$t2_flw_visit_first24)==F) &amp; (data_hh_anly\$t2_flw_visit_firstweek==0 &amp; is.na(data_hh_anly\$t2_flw_visit_firstweek)==F)),0,NA))  data_hh_anly \$ flw_firstweek_24hrinclude &lt;- ifelse(data_hh_anly\$endline==1, data_hh_anly\$t2_flw_firstweek_24hrinclude, dat_hh_anly\$t0_flw_firstweek_24hrinclude</pre> | At least one Home Visit in first week after delivery (y/n)              |
