# Supplementary material for: Effects of team-based goals and non-monetary incentives on front-line health worker performance and maternal health behaviours: a cluster randomised controlled trial in Bihar, India
Source: PubMed Central journal article supplement (PMC6730593; doi:10.1136/bmjgh-2018-001146), 2019-08-26
Supplement: bmjgh-2018-001146supp002.pdf [file bmjgh-2018-001146supp002.pdf]

**Supplementary Table 1. Comparison of the percentage of maternal respondents from control and intervention villages who received different types of advice from frontline workers (FLW), stratified by types of FLW visits they received, as reported by maternal respondents post-implementation of the Team-Based Goals and Incentives intervention trial in Begusarai, Bihar, 2012-2014.<sup>a</sup>**

| Advice received from a FLW        | Type of FLW visit received                                                     | Control |      | Inter-vention |      | p-value |
|-----------------------------------|--------------------------------------------------------------------------------|---------|------|---------------|------|---------|
|                                   |                                                                                | N       | (%)  | N             | (%)  |         |
| Advice on iron-folic acid tablets | ≥2 antenatal care (ANC) visits                                                 | 446     | 37.9 | 570           | 52.1 | 0.03    |
|                                   | <2 ANC visits                                                                  | 385     | 18.8 | 289           | 23.7 | 0.09    |
| Advice on immediate breastfeeding | ≥2 ANC visits                                                                  | 446     | 52.1 | 570           | 55.7 | 0.52    |
|                                   | <2 ANC visits                                                                  | 385     | 9.7  | 289           | 6.7  | 0.43    |
|                                   | Home visit within 24 hours of delivery, among women who had a home delivery    | 32      | 37.3 | 37            | 68.8 | 0.01    |
|                                   | No home visit within 24 hours of delivery, among women who had a home delivery | 107     | 8.6  | 100           | 11.4 | 0.55    |
| Advice on exclusive breastfeeding | ≥2 ANC visits                                                                  | 439     | 61.0 | 567           | 69.2 | 0.15    |
|                                   | >2 ANC visits                                                                  | 383     | 12.9 | 287           | 17.1 | 0.27    |
|                                   | Home visit within 24 hours of delivery, among women who had a home delivery    | 31      | 51.6 | 37            | 87.3 | <0.01   |
|                                   | No home visit within 24 hours of delivery, among women who had a home delivery | 106     | 14.6 | 99            | 17.1 | 0.61    |
|                                   | Home visit within 1 week of delivery                                           | 403     | 75.8 | 475           | 86.8 | 0.03    |
|                                   | No home visit within 1 week of delivery                                        | 417     | 8.0  | 372           | 11.9 | 0.12    |
| Advice on keeping cord clean      | ≥2 ANC visits                                                                  | 446     | 52.1 | 570           | 59.1 | 0.15    |
|                                   | <2 ANC visits                                                                  | 385     | 9.0  | 289           | 9.1  | 0.80    |
|                                   | Home visit within 24 hours of delivery, among women who had a home delivery    | 32      | 55.8 | 37            | 73.2 | 0.25    |

|                                                                                                |                                                                                                |      |      |     |      |       |
|------------------------------------------------------------------------------------------------|------------------------------------------------------------------------------------------------|------|------|-----|------|-------|
|                                                                                                | No home visit within 24 hours of delivery, among women who had a home delivery                 | 107  | 10.6 | 100 | 10.5 | 0.93  |
|                                                                                                | Home visit within 1 week of delivery                                                           | 408  | 63.9 | 479 | 71.3 | 0.07  |
|                                                                                                | No home visit within 1 week of delivery                                                        | 419  | 5.8  | 372 | 9.1  | 0.18  |
| Advice to start complementary feeding at age 6 months, among women with infant 6-11 months old | Received complementary feeding home visit for women with infant 6-11 months old                | 107  | 83.4 | 140 | 93.0 | <0.01 |
|                                                                                                | Did not receive complementary feeding home visit for women with infant 6-11 months old         | n.a. |      |     |      |       |
| Advice to start family planning at age 6 months, among women with infant <6 months old         | ≥2 ANC visits                                                                                  | 229  | 19.2 | 303 | 30.4 | 0.02  |
|                                                                                                | <2 ANC visits                                                                                  | 216  | 4.6  | 194 | 9.8  | 0.20  |
|                                                                                                | Did not receive postpartum family planning home visits for women with infant <6 months old     | n.a. |      |     |      |       |
|                                                                                                | Received postpartum family planning home visits for women with infant <6 months old            | 396  | 2.8  | 410 | 6.4  | 0.04  |
| Advice to start family planning at age 6 months, among women with infant 6-11 months old       | Did not receive postpartum family planning home visits for women with infant 6-11 months old   | n.a. |      |     |      |       |
|                                                                                                | Received received postpartum family planning home visits for women with infant 6-11 months old | 323  | 4.4  | 295 | 4.7  | 0.79  |

<sup>a</sup>Survey-weighted percentages and counts are reported, to account for the survey design. A separate logistic regression model was conducted for each outcome. Each model accounted for village as the primary sampling unit and sub-center as the primary stratum within the sampling unit, and with proportional sampling weights at the maternal respondent/household level; each model was also adjusted for maternal age (as a continuous variable) and caste (non-Hindu, Hindu SC/ST, Hindu not SC/ST).

n.a. = not available (these questions were not asked, due to skip patterns inherent to the questionnaires)
