# Supplementary material for: Effects of team-based goals and non-monetary incentives on front-line health worker performance and maternal health behaviours: a cluster randomised controlled trial in Bihar, India
Source: PubMed Central journal article supplement (PMC6730593; doi:10.1136/bmjgh-2018-001146), 2019-08-26
Supplement: bmjgh-2018-001146supp003.pdf [file bmjgh-2018-001146supp003.pdf]

**Supplementary Table 2. Impact of the Team-Based Goals and Incentives (TBGI) intervention on goal-related behaviors, as reported by maternal respondents, Begusarai, Bihar, 2012-2014, stratified by whether respondents reported receiving relevant home visits from frontline workers.<sup>a</sup>**

| Goal-related behaviors <sup>b</sup>                                                    | Goal number <sup>b</sup> | Stratified by      | Baseline (%) <sup>c</sup><br>(May-June 2012)<br>n=1680 |                 |                      |         | Post-implementation (%) <sup>c</sup><br>(Nov-Dec 2014)<br>n=1690 |                 |                      |         | Difference in Difference <sup>d</sup><br>n=3370 |                                         |         |
|----------------------------------------------------------------------------------------|--------------------------|--------------------|--------------------------------------------------------|-----------------|----------------------|---------|------------------------------------------------------------------|-----------------|----------------------|---------|-------------------------------------------------|-----------------------------------------|---------|
|                                                                                        |                          |                    | No. in model                                           | Control (n=849) | Intervention (n=831) | p-value | No. in model                                                     | Control (n=831) | Intervention (n=859) | p-value | No. in model                                    | Percent difference attributable to TBGI | p-value |
| Stratified based on receiving at least 2 antenatal home visits in the final trimester: |                          |                    |                                                        |                 |                      |         |                                                                  |                 |                      |         |                                                 |                                         |         |
| Obtained phone number for delivery:                                                    |                          |                    |                                                        |                 |                      |         |                                                                  |                 |                      |         |                                                 |                                         |         |
| a. Frontline worker's (FLW) number                                                     | 1                        | Less than 2 visits | n.a.                                                   | n.a.            | n.a.                 | n.a.    | 674                                                              | 26.6            | 19.2                 | 0.08    | n.a.                                            | n.a.                                    | n.a.    |
|                                                                                        |                          | At least 2 visits  | n.a.                                                   | n.a.            | n.a.                 | n.a.    | 1016                                                             | 66.4            | 67.3                 | 0.76    | n.a.                                            | n.a.                                    | n.a.    |
| b. Number for private vehicle                                                          | 1                        | Less than 2 visits | n.a.                                                   | n.a.            | n.a.                 | n.a.    | 674                                                              | 2.5             | 4.4                  | 0.22    | n.a.                                            | n.a.                                    | n.a.    |
|                                                                                        |                          | At least 2 visits  | n.a.                                                   | n.a.            | n.a.                 | n.a.    | 1016                                                             | 14.7            | 30.5                 | <0.01   | n.a.                                            | n.a.                                    | n.a.    |
| c. Number for ambulance                                                                | 1                        | Less than 2 visits | n.a.                                                   | n.a.            | n.a.                 | n.a.    | 674                                                              | 5.0             | 8.9                  | 0.07    | n.a.                                            | n.a.                                    | n.a.    |
|                                                                                        |                          | At least 2 visits  | n.a.                                                   | n.a.            | n.a.                 | n.a.    | 1016                                                             | 16.5            | 28.8                 | <0.01   | n.a.                                            | n.a.                                    | n.a.    |
| Received 90 IFA tablets                                                                | 2                        | Less than 2 visits | 1086                                                   | 25.1            | 21.5                 | 0.37    | 673                                                              | 7.9             | 11.9                 | 0.02    | 1759                                            | 6.0                                     | 0.06    |
|                                                                                        |                          | At least 2 visits  | 578                                                    | 25.7            | 27.4                 | 0.71    | 1013                                                             | 13.5            | 18.2                 | 0.07    | 1591                                            | 5.6                                     | 0.25    |
| Immediate breastfeeding (within 1 hour of delivery)                                    | 3                        | Less than 2 visits | 1087                                                   | 41.3            | 41.8                 | 0.93    | 672                                                              | 49.6            | 60.5                 | 0.08    | 1759                                            | 8.2                                     | 0.18    |
|                                                                                        |                          | At least 2 visits  | 578                                                    | 58.2            | 56.2                 | 0.84    | 1015                                                             | 58.0            | 60.2                 | 0.78    | 1593                                            | 6.4                                     | 0.64    |

|                                                                                                  |   |                                                  |      |      |      |        |     |      |      |      |      |       |        |
|--------------------------------------------------------------------------------------------------|---|--------------------------------------------------|------|------|------|--------|-----|------|------|------|------|-------|--------|
| Nothing applied to the cord after cutting                                                        | 4 | Less than 2 visits                               | 1087 | 52.0 | 52.5 | 0.99   | 625 | 53.3 | 53.5 | 0.94 | 1712 | -0.5  | 0.96   |
|                                                                                                  |   | At least 2 visits                                | 578  | 18.8 | 19.0 | 1.00   | 934 | 53.2 | 53.1 | 0.96 | 1512 | -0.8  | 0.99   |
| Stratified based on complementary feeding home visit for women with infant 6-11 months old:      |   |                                                  |      |      |      |        |     |      |      |      |      |       |        |
| Infant age 6-11 months old ate cereal-based meal in previous day                                 | 5 | Did not receive complementary feeding home visit | 782  | 41.5 | 55.1 | 0.47   | 519 | 52.8 | 65.8 | 0.02 | 1301 | -4.7  | 0.200  |
|                                                                                                  |   | Received complementary feeding home visit        | 11   | 0    | 51.2 | <0.001 | 225 | 59.4 | 75.9 | 0.01 | 236  | -5.1  | <0.001 |
| Stratified based on postpartum family planning home visits for women with infant <6 months old:  |   |                                                  |      |      |      |        |     |      |      |      |      |       |        |
| Current use of any modern method of contraception, among women with infants <6 months old        | 6 | No Postpartum family planning home visits        | 712  | 11.7 | 10.0 | 0.53   | 762 | 7.8  | 8.3  | 0.89 | 1474 | -0.35 | 0.666  |
|                                                                                                  |   | Had Postpartum family planning home visits       | 106  | 59.9 | 53.4 | 0.70   | 130 | 27.5 | 18.2 | 0.39 | 236  | -1.2  | 0.816  |
| Stratified based on postpartum family planning home visits for women with infant 6-11 months old |   |                                                  |      |      |      |        |     |      |      |      |      |       |        |
| Current use of any modern method of contraception, among women with infants                      | 6 | No Postpartum family planning home visits        | 721  | 16.8 | 13.7 | 0.33   | 598 | 15.7 | 14.7 | 0.56 | 1319 | 8.1   | 0.747  |
|                                                                                                  |   | Had Postpartum family                            | 91   | 61.6 | 43.1 | 0.30   | 128 | 33.9 | 32.3 | 0.84 | 219  | 7.3   | 0.345  |
