# Supplementary material for: Effects of team-based goals and non-monetary incentives on front-line health worker performance and maternal health behaviours: a cluster randomised controlled trial in Bihar, India
Source: PubMed Central journal article supplement (PMC6730593; doi:10.1136/bmjgh-2018-001146), 2019-08-26
Supplement: bmjgh-2018-001146supp004.pdf [file bmjgh-2018-001146supp004.pdf]

**Supplementary Table 3. Impacts of the Team-Based Goals and Incentives (TBGI) intervention on selected behaviors, as reported by maternal respondents, Begusarai, Bihar, 2012-2014.<sup>a</sup>**

| Modeled indicators                                                                                 | Baseline (%) <sup>b</sup><br>(May-June 2012) |              |         | Post-implementation (%) <sup>b</sup><br>(Nov-Dec 2014) |              |         | Difference in<br>Difference <sup>c</sup> |         |
|----------------------------------------------------------------------------------------------------|----------------------------------------------|--------------|---------|--------------------------------------------------------|--------------|---------|------------------------------------------|---------|
|                                                                                                    | Control                                      | Intervention | p-value | Control                                                | Intervention | p-value | Percent difference attributable to TBGI  | p-value |
| <b>Antenatal care</b>                                                                              |                                              |              |         |                                                        |              |         |                                          |         |
| At least 2 TT injections or booster injection                                                      | 94.5                                         | 93.1         | 0.46    | 83.8                                                   | 89.5         | 0.02    | 7.1                                      | 0.08    |
| At least 90 IFA tablets consumed                                                                   | 12.8                                         | 11.1         | 0.58    | 10.9                                                   | 15.9         | 0.01    | 6.5                                      | 0.06    |
| <b>Delivery and newborn care</b>                                                                   |                                              |              |         |                                                        |              |         |                                          |         |
| Facility delivery                                                                                  | 66.5                                         | 70.1         | 0.22    | 81.4                                                   | 83.4         | 0.35    | -1.6                                     | 0.88    |
| Bath delayed by at least 2 days                                                                    | 44.9                                         | 48.0         | 0.48    | 46.1                                                   | 46.1         | 0.95    | -3.1                                     | 0.54    |
| Skin-to-skin care                                                                                  | 22.0                                         | 22.0         | 0.88    | 46.7                                                   | 52.0         | 0.35    | 5.3                                      | 0.51    |
| Exclusive breastfeeding for 6 months, reported for children 6 months or older (no water)           | 32.7                                         | 38.5         | 0.35    | 30.2                                                   | 54.8         | <0.01   | 18.5                                     | 0.03    |
| Exclusive breastfeeding in past 24 hours, reported for children younger than 6 months <sup>d</sup> | 51.3                                         | 43.1         | 0.10    | 80.1                                                   | 73.2         | 0.08    | 1.8                                      | 0.91    |
| <b>Child nutrition (child 6–11 months)</b>                                                         |                                              |              |         |                                                        |              |         |                                          |         |
| Child eats solid or semisolid food                                                                 | 48.0                                         | 52.0         | 0.37    | 66.8                                                   | 82.7         | <0.01   | 11.8                                     | <0.01   |
| Child began eating solid food by age 6 months                                                      | 27.4                                         | 30.4         | 0.56    | 42.1                                                   | 55.4         | <0.01   | 10.6                                     | 0.12    |

|                                                               |      |      |      |      |      |       |      |       |
|---------------------------------------------------------------|------|------|------|------|------|-------|------|-------|
| Appropriate frequency of feeding in previous day <sup>e</sup> | 20.6 | 22.5 | 0.70 | 32.3 | 44.0 | <0.01 | 9.4  | 0.27  |
| <b>Immunizations (child 6–11 months)</b>                      |      |      |      |      |      |       |      |       |
| Received measles vaccine (for children 9–11 months)           | 33.4 | 34.6 | 0.57 | 40.2 | 68.4 | <0.01 | 26.9 | <0.01 |

<sup>a</sup> Survey-weighted percentages and counts are reported, to account for the survey design. Survey logistic regression models were performed that accounted for village as the primary sampling unit and sub-center as the primary stratum within the sampling unit, with proportional sampling weights at the maternal respondent/household level; each model also included maternal age (as a continuous variable) and caste (non-Hindu, Hindu SC/ST, Hindu not SC/ST).

<sup>b</sup> Separate regression models were conducted for each outcome, at baseline and post-implementation; p-values reflect comparisons of the intervention and control groups, at each time point.

<sup>c</sup> In order to estimate the effect of the TBGI intervention on a particular indicator, we conducted a separate regression model for each outcome that included all maternal respondents. These models each contained a term representing time (baseline or post-implementation), a term representing treatment (intervention or control), and an interaction of these two terms, which is represented by the difference in difference estimator (DID) and its p-value. The DID reflects treatment effects (positive values reflect the amount of improvement attributable to the intervention).

<sup>d</sup> Based on reports of liquids and solids fed to children younger than 6 months old in the previous 24 hours, following the recommended definition of the World Health Organization

<sup>e</sup> Defined as 2 or more times for children 6-8 months old and 3 or more times for children 9-11 months old.
